# Supplementary material
Source: publisher figshare collection journal article supplement (https://tandf.figshare.com/ndownloader/files/38558288)

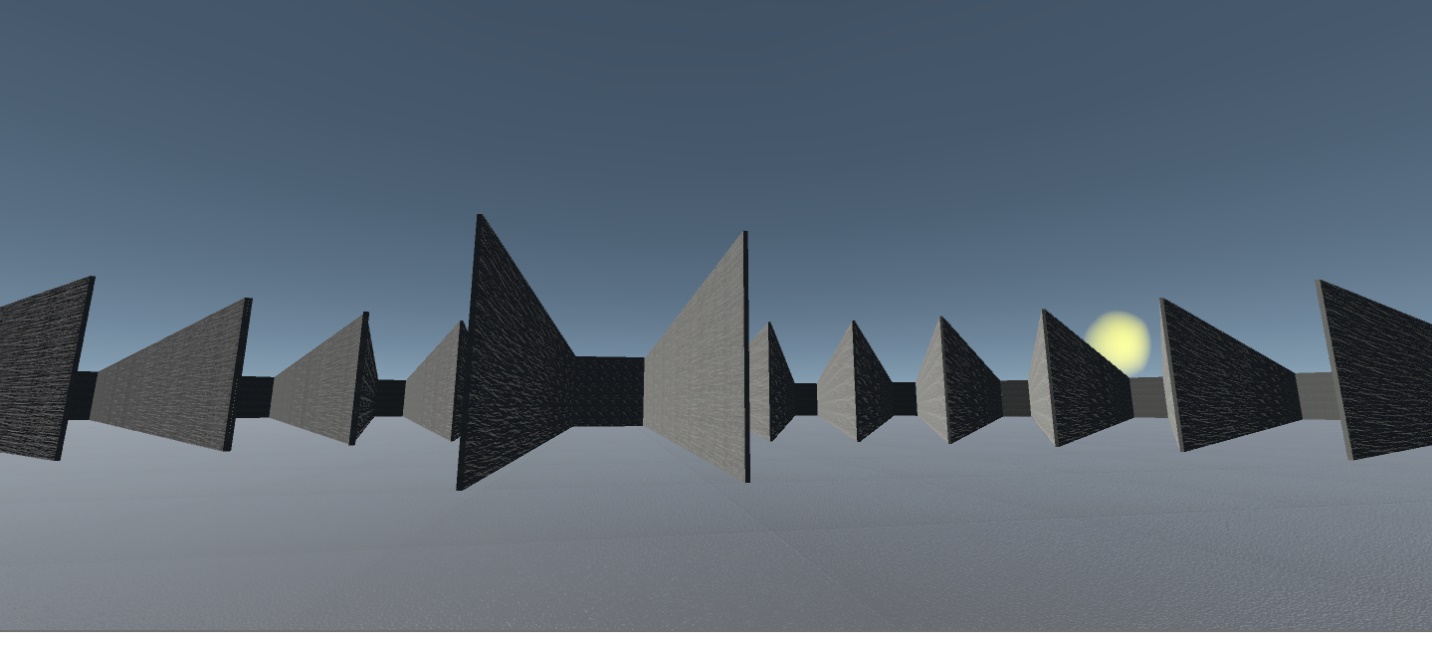


Supplemental 2: Test environment in the Light Stable condition.

Supplement: Supplementary file 1 [file 38558288]
